# Supplementary material for: A Common Mechanism Underlying Food Choice and Social Decisions
Source: PubMed Central journal article supplement (PMC4604207; doi:10.1371/journal.pcbi.1004371), 2015-10-13
Supplement: pcbi.1004371.s006.pdf [file pcbi.1004371.s006.pdf]

**A**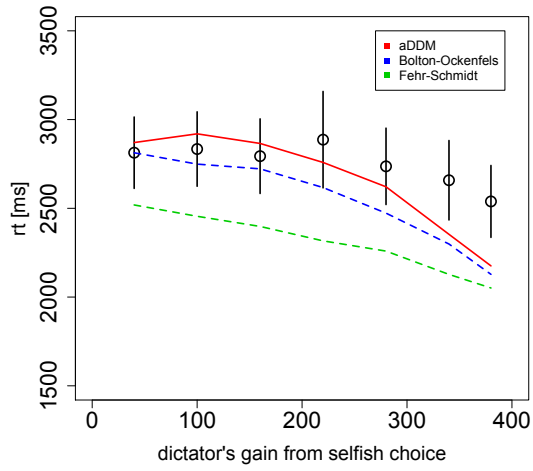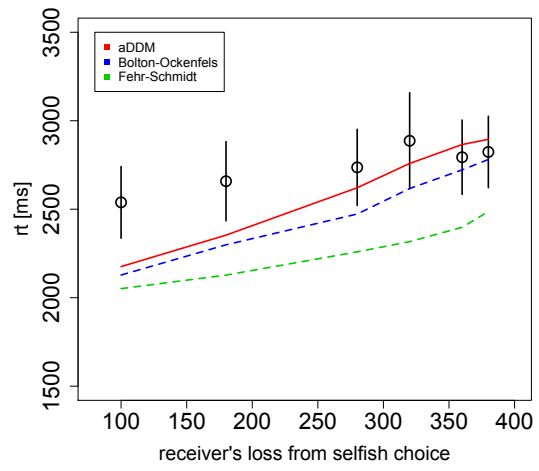**B**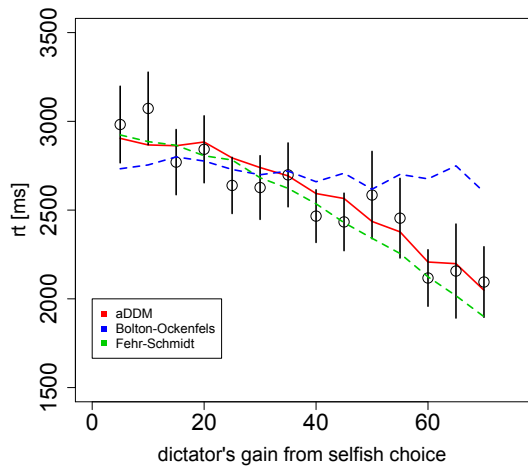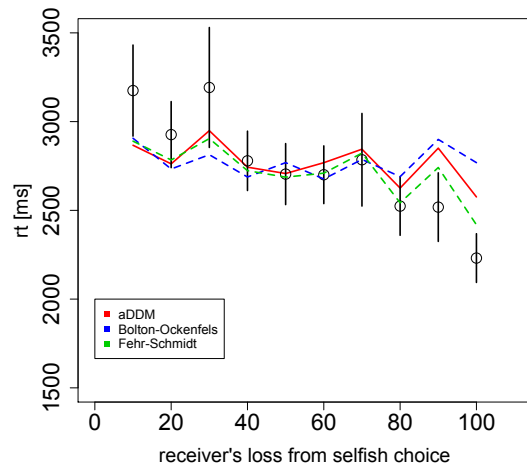**C**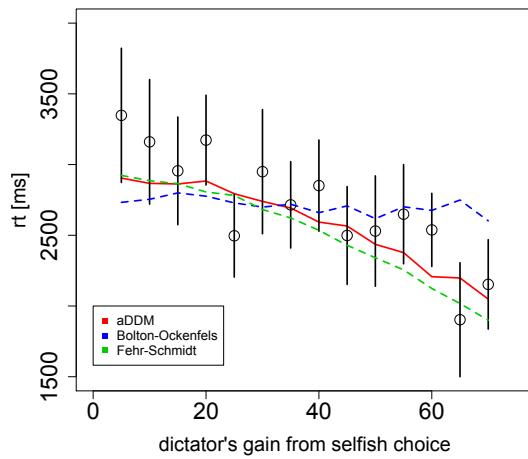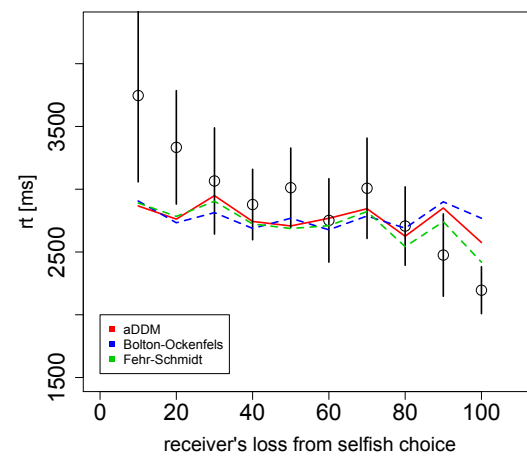

**D**

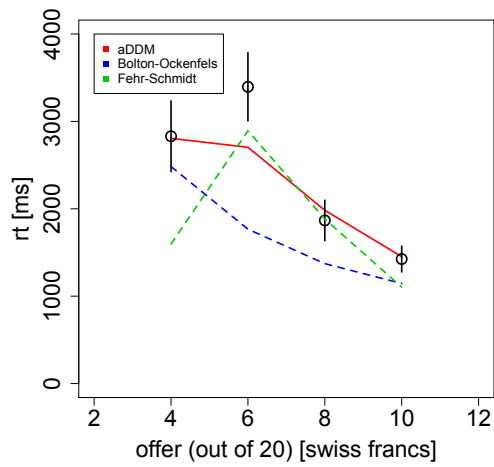

**Figure S5:** Replications of the main text RT figures with the alternative Fehr-Schmidt and Bolton-Ockenfels models **A)** Task 1 (related to Fig. 2 in main text), **B)** Task 2 (related to Fig. 3 in main text), **C)** Task 3 (related to Fig. 4 in main text), **D)** Task 4 (related to Fig. 5 in main text). Black circles indicate the aggregate subject data with bars representing s.e.m. Dashed lines indicate the alternative model predictions, while the solid red line indicates the predictions of the aDDM.
