# Supplementary material for: A Common Mechanism Underlying Food Choice and Social Decisions
Source: PubMed Central journal article supplement (PMC4604207; doi:10.1371/journal.pcbi.1004371), 2015-10-13
Supplement: pcbi.1004371.s007.pdf [file pcbi.1004371.s007.pdf]

|          | Points A | Points B | Points C |
|----------|----------|----------|----------|
| Option 1 | 100      | 100      | 100      |
| Option 2 | 125      | 125      | 80       |

**Figure S6:** An example decision screen from Task 2. Note that the payoffs for Player A (the dictator) and Player B (the partner) are always the same in this task. The aDDM accurately predicts that the dictator will thus treat the game as if there were only two players, Player A and Player C (the receiver).
