# Supplementary material for: A Common Mechanism Underlying Food Choice and Social Decisions
Source: PubMed Central journal article supplement (PMC4604207; doi:10.1371/journal.pcbi.1004371), 2015-10-13
Supplement: pcbi.1004371.s008.pdf [file pcbi.1004371.s008.pdf]

|          | Points A<br>and B<br>(each) | Points C |
|----------|-----------------------------|----------|
| Option 1 | 130                         | 40       |
| Option 2 | 155                         | 20       |

**Figure S7:** An example decision screen from Task 3. Note that in contrast to Task 2, there are only two columns of payoffs in this task.
