# Supplementary material for: A Common Mechanism Underlying Food Choice and Social Decisions
Source: PubMed Central journal article supplement (PMC4604207; doi:10.1371/journal.pcbi.1004371), 2015-10-13
Supplement: pcbi.1004371.s009.pdf [file pcbi.1004371.s009.pdf]

| Goodness of fit            | aDDM fit     |
|----------------------------|--------------|
| Fig. 2a error              | 3.07%        |
| Fig. 2a $\chi^2$ (p-value) | 3.93 (0.69)  |
| Fig. 2b error              | 2.67%        |
| Fig. 2b $\chi^2$ (p-value) | 3.93 (0.56)  |
| Fig. 2c error              | 5.57%        |
| Fig. 2c p-values           | 0.06, 0.4    |
| Fig. 3a error              | 5.61%        |
| Fig. 3a $\chi^2$ (p-value) | 16.35 (0.23) |
| Fig. 3b error              | 3.42%        |
| Fig. 3b $\chi^2$ (p-value) | 18.18 (0.03) |
| Fig. 3c error              | 3.14%        |
| Fig. 3c p-values           | 0.87, 1      |
| Fig. 3d error              | 5.20%        |
| Fig. 3d p-values           | 0.03, 0.03   |
| Fig. 4a error              | 9.06%        |
| Fig. 4a $\chi^2$ (p-value) | 22.41 (0.05) |
| Fig. 4b error              | 6.55%        |
| Fig. 4b $\chi^2$ (p-value) | 17.87 (0.04) |
| Fig. 4c error              | 5.61%        |
| Fig. 4c p-values           | 0.49, 0.22   |
| Fig. 4d error              | 8.07%        |
| Fig. 4d p-values           | 0.10, 0.36   |
| Fig. 4a error              | 5.65%        |
| Fig. 4a $\chi^2$ (p-value) | 4.42 (0.22)  |
| Fig. 4b error              | 6.32%        |
| Fig. 4b p-values           | 0.5, 0.31    |

**Table S1:** Goodness-of-fit statistics for the aDDM. ‘Error’ refers to the average difference between the model predictions and the actual data, as described in the main text. P-values refer to the more traditional goodness-of-fit measures, described in the methods. For reaction-time goodness of fits, the listed p-values are for the slope and intercept, respectively. When taking into account corrections for multiple-comparisons, none of the data reject the model.
