# Supplementary material for: A Common Mechanism Underlying Food Choice and Social Decisions
Source: PubMed Central journal article supplement (PMC4604207; doi:10.1371/journal.pcbi.1004371), 2015-10-13
Supplement: pcbi.1004371.s010.pdf [file pcbi.1004371.s010.pdf]

|           | Actual self<br>payoff range | Payoffs' order of<br>magnitude $\bar{v}$ | $d$      | $d \cdot \bar{v}$ | $\sigma$    | $\theta$    |
|-----------|-----------------------------|------------------------------------------|----------|-------------------|-------------|-------------|
| Food task | 0 – 10                      | 10                                       | 0.0002   | <b>0.002</b>      | <b>0.02</b> | <b>0.3</b>  |
| Task 1    | 240 – 1170                  | 1000                                     | 0.000002 | <b>0.002</b>      | <b>0.02</b> | <b>0.3</b>  |
| Task 2    | 100 – 170                   | 100                                      | 0.00002  | <b>0.002</b>      | <b>0.02</b> | <b>0.3</b>  |
| Task 3    | 100 – 170                   | 100                                      | 0.00002  | <b>0.002</b>      | <b>0.02</b> | <b>0.3</b>  |
| Task 4    | 0 – 10                      | 10                                       | 0.0002   | <b>0.002</b>      | <b>0.02</b> | <b>-0.3</b> |

**Table S2:** Value ranges and parameters used in the original food study and the social-preference Tasks 1-4 of the current study.
