# Supplementary material for: A Common Mechanism Underlying Food Choice and Social Decisions
Source: PubMed Central journal article supplement (PMC4604207; doi:10.1371/journal.pcbi.1004371), 2015-10-13
Supplement: pcbi.1004371.s011.pdf [file pcbi.1004371.s011.pdf]

| Self Unfair | Self Fair | Other Unfair | Other Fair |
|-------------|-----------|--------------|------------|
| 1000        | 960       | 30           | 410        |
| 1000        | 960       | 270          | 650        |
| 800         | 760       | -410         | -30        |
| 560         | 520       | -650         | -270       |
| 480         | 440       | 550          | 930        |
| 760         | 720       | 30           | 410        |
| 760         | 720       | 270          | 650        |
| 240         | 200       | 790          | 1170       |
| 240         | 200       | 550          | 930        |
| 480         | 440       | 790          | 1170       |
| 790         | 690       | 30           | 410        |
| 790         | 690       | 270          | 650        |
| 590         | 490       | -650         | -270       |
| 510         | 410       | 550          | 930        |
| 1030        | 930       | 30           | 410        |
| 270         | 170       | 550          | 930        |
| 510         | 410       | 790          | 1170       |
| 830         | 730       | -410         | -30        |
| 1030        | 930       | 270          | 650        |
| 270         | 170       | 790          | 1170       |
| 540         | 380       | 560          | 920        |
| 860         | 700       | -400         | -40        |
| 620         | 460       | -640         | -280       |
| 820         | 660       | 40           | 400        |
| 820         | 660       | 280          | 640        |
| 1060        | 900       | 280          | 640        |
| 540         | 380       | 800          | 1160       |
| 300         | 140       | 560          | 920        |
| 1060        | 900       | 40           | 400        |
| 300         | 140       | 800          | 1160       |
| 570         | 350       | 820          | 1140       |
| 330         | 110       | 820          | 1140       |
| 850         | 630       | 300          | 620        |
| 1090        | 870       | 300          | 620        |
| 1090        | 870       | 60           | 380        |
| 330         | 110       | 580          | 900        |
| 570         | 350       | 580          | 900        |
| 650         | 430       | -620         | -300       |
| 850         | 630       | 60           | 380        |
| 890         | 670       | -380         | -60        |
| 680         | 400       | -600         | -320       |
| 880         | 600       | 320          | 600        |
| 1120        | 840       | 320          | 600        |
| 360         | 80        | 600          | 880        |
| 600         | 320       | 840          | 1120       |

|      |     |      |      |
|------|-----|------|------|
| 880  | 600 | 80   | 360  |
| 360  | 80  | 840  | 1120 |
| 600  | 320 | 600  | 880  |
| 1120 | 840 | 80   | 360  |
| 920  | 640 | -360 | -80  |
| 390  | 50  | 650  | 830  |
| 1150 | 810 | 370  | 550  |
| 910  | 570 | 370  | 550  |
| 950  | 610 | -310 | -130 |
| 1150 | 810 | 130  | 310  |
| 390  | 50  | 890  | 1070 |
| 630  | 290 | 890  | 1070 |
| 710  | 370 | -550 | -370 |
| 910  | 570 | 130  | 310  |
| 630  | 290 | 650  | 830  |
| 650  | 270 | 690  | 790  |
| 650  | 270 | 930  | 1030 |
| 970  | 590 | -270 | -170 |
| 930  | 550 | 170  | 270  |
| 1170 | 790 | 170  | 270  |
| 1170 | 790 | 410  | 510  |
| 410  | 30  | 690  | 790  |
| 730  | 350 | -510 | -410 |
| 930  | 550 | 410  | 510  |
| 410  | 30  | 930  | 1030 |

**Table S3:** Payoffs for the dictator (self) and receiver (other) for the two options in Task 1. Points were converted to Swiss Francs at the end of the experiment.
