# Supplementary material for: A Common Mechanism Underlying Food Choice and Social Decisions
Source: PubMed Central journal article supplement (PMC4604207; doi:10.1371/journal.pcbi.1004371), 2015-10-13
Supplement: pcbi.1004371.s012.pdf [file pcbi.1004371.s012.pdf]

| Self Fair | Other Fair | Self Unfair | Other Unfair |
|-----------|------------|-------------|--------------|
| 100       | 100        | 155         | 20           |
| 110       | 80         | 125         | 60           |
| 100       | 100        | 145         | 20           |
| 100       | 100        | 120         | 40           |
| 110       | 80         | 125         | 10           |
| 100       | 100        | 135         | 0            |
| 110       | 80         | 155         | 0            |
| 100       | 100        | 140         | 40           |
| 130       | 40         | 145         | 0            |
| 100       | 100        | 145         | 10           |
| 110       | 80         | 125         | 40           |
| 120       | 60         | 130         | 40           |
| 120       | 60         | 130         | 0            |
| 100       | 100        | 130         | 60           |
| 110       | 80         | 140         | 60           |
| 100       | 100        | 135         | 30           |
| 110       | 80         | 120         | 40           |
| 130       | 40         | 155         | 0            |
| 130       | 40         | 155         | 20           |
| 100       | 100        | 130         | 10           |
| 130       | 40         | 140         | 20           |
| 110       | 80         | 150         | 30           |
| 100       | 100        | 170         | 0            |
| 130       | 40         | 170         | 0            |
| 100       | 100        | 160         | 0            |
| 130       | 40         | 135         | 0            |
| 110       | 80         | 140         | 20           |
| 110       | 80         | 135         | 20           |
| 130       | 40         | 150         | 20           |
| 110       | 80         | 155         | 30           |
| 100       | 100        | 115         | 70           |
| 110       | 80         | 130         | 60           |
| 110       | 80         | 125         | 20           |
| 140       | 20         | 150         | 0            |
| 130       | 40         | 160         | 0            |
| 100       | 100        | 145         | 0            |
| 110       | 80         | 145         | 30           |
| 100       | 100        | 110         | 80           |
| 100       | 100        | 130         | 0            |
| 100       | 100        | 125         | 40           |
| 130       | 40         | 160         | 20           |
| 100       | 100        | 125         | 50           |
| 100       | 100        | 115         | 30           |
| 110       | 80         | 130         | 10           |
| 100       | 100        | 115         | 60           |

|     |     |     |    |
|-----|-----|-----|----|
| 100 | 100 | 110 | 40 |
| 120 | 60  | 140 | 20 |
| 130 | 40  | 135 | 10 |
| 100 | 100 | 155 | 0  |
| 110 | 80  | 130 | 20 |
| 130 | 40  | 150 | 0  |
| 100 | 100 | 140 | 20 |
| 100 | 100 | 120 | 20 |
| 100 | 100 | 140 | 0  |
| 100 | 100 | 135 | 10 |
| 100 | 100 | 130 | 80 |
| 100 | 100 | 130 | 40 |
| 100 | 100 | 120 | 60 |
| 110 | 80  | 165 | 0  |
| 100 | 100 | 105 | 80 |
| 100 | 100 | 145 | 40 |
| 110 | 80  | 130 | 40 |
| 100 | 100 | 125 | 10 |
| 100 | 100 | 125 | 60 |
| 110 | 80  | 130 | 0  |
| 130 | 40  | 165 | 0  |
| 110 | 80  | 140 | 30 |
| 130 | 40  | 140 | 10 |
| 100 | 100 | 120 | 80 |
| 130 | 40  | 140 | 0  |
| 100 | 100 | 150 | 40 |
| 110 | 80  | 135 | 60 |
| 130 | 40  | 145 | 20 |
| 100 | 100 | 105 | 90 |
| 110 | 80  | 135 | 0  |
| 110 | 80  | 115 | 30 |
| 100 | 100 | 115 | 80 |
| 120 | 60  | 150 | 0  |
| 100 | 100 | 150 | 20 |
| 100 | 100 | 165 | 0  |
| 110 | 80  | 120 | 20 |
| 100 | 100 | 135 | 20 |
| 110 | 80  | 120 | 60 |
| 100 | 100 | 130 | 20 |
| 100 | 100 | 135 | 40 |
| 100 | 100 | 115 | 50 |
| 100 | 100 | 125 | 80 |
| 100 | 100 | 135 | 60 |
| 110 | 80  | 120 | 30 |
| 100 | 100 | 160 | 20 |
| 100 | 100 | 140 | 60 |

|     |     |     |    |
|-----|-----|-----|----|
| 100 | 100 | 110 | 50 |
| 110 | 80  | 140 | 0  |
| 110 | 80  | 150 | 0  |
| 130 | 40  | 135 | 20 |
| 100 | 100 | 150 | 0  |
| 110 | 80  | 160 | 0  |
| 100 | 100 | 125 | 20 |
| 110 | 80  | 170 | 0  |
| 100 | 100 | 115 | 40 |

**Table S4:** Payoffs for the dictators (self) and receiver (other) for the two options in Tasks 2 & 3. Points were converted to Swiss Francs at the end of the experiment.
